# Supplementary material for: Machine-learning methods for stream water temperature prediction
Source: Copernicus journal article supplement (doi:10.5194/hess-25-2951-2021), 2021-05-31
Supplement: Supplementary file [file hess-25-2951-2021-supplement-title-page.pdf › hess-25-2951-2021-supplement-title-page.pdf]

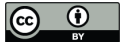

## *Supplement of*

# **Machine-learning methods for stream water temperature prediction**

**Moritz Feigl et al.**

*Correspondence to:* Moritz Feigl (moritz.feigl@boku.ac.at)

- hess-25-2951-2021-supplement-title-page.pdf
- FeiglLebiedzinski\_etal\_2021\_HESS\_supplement
  - FNN\_hyperparameters.csv
  - GRU\_hyperparameters.csv
  - LSTM\_hyperparameters.csv
  - RF\_hyperparameters.csv
  - XGBoost\_hyperparameters.csv
  - models\_2015\_Aschach.png
  - models\_2015\_Danube.png
  - models\_2015\_Enns.png
  - models\_2015\_Erlauf.png
  - models\_2015\_Kleine\_Muehl.png
  - models\_2015\_Saalach.png
  - models\_2015\_Salzach.png
  - models\_2015\_Traisen.png
  - models\_2015\_Ybbs.png

The copyright of individual parts of the supplement might differ from the article licence.
